# Supplementary material
Source: PubMed Central journal article supplement (PMC4511292)
Supplement: tx5b00140_si_001.pdf [file tx5b00140_si_001.pdf]

Supporting Information

**Base-Displaced Intercalated Conformation of the 2-Amino-3-methylimidazo[4,5-f]quinolone *N*<sup>2</sup>-dG DNA Adduct Positioned at the non-Reiterated G<sup>1</sup> in the NarI Restriction Site**

Kallie M. Stavros, Edward K. Hawkins, Carmelo J. Rizzo, and Michael P. Stone\*

<sup>1</sup> Department of Chemistry, Center in Molecular Toxicology, Vanderbilt-Ingram Cancer Center, and Vanderbilt Institute of Chemical Biology, Vanderbilt University, Nashville, Tennessee, 37235-1822, United States of America

<sup>2</sup> Deceased

\*To whom correspondence should be addressed

Telephone 615-322-2589

e-mail: Kallie M. Stavros, [kallie.m.stavros@vanderbilt.edu](mailto:kallie.m.stavros@vanderbilt.edu); Carmelo J. Rizzo, [c.rizzo@vanderbilt.edu](mailto:c.rizzo@vanderbilt.edu); Michael P. Stone, [michael.p.stone@vanderbilt.edu](mailto:michael.p.stone@vanderbilt.edu)

**Table S1.** Comparative Thermal Melting Temperatures ( $T_m$ ) of IQ, AF, and AAF-Modified Oligodeoxynucleotides.

|          | Oligodeoxynucleotide <sup>a</sup>                                                    | $T_m$ ( $\Delta T_m$ ) <sup>b</sup> |                    |                     |                                 |
|----------|--------------------------------------------------------------------------------------|-------------------------------------|--------------------|---------------------|---------------------------------|
|          |                                                                                      | C8-IQ <sup>c, d</sup>               | C8-AF <sup>d</sup> | C8-AAF <sup>e</sup> | N <sup>2</sup> -IQ <sup>f</sup> |
| <b>a</b> | 5' -CTC <b>G</b> GC GCC ATC-3' <i>NarI</i> -G <sub>1</sub><br>3' -GAG CCG CGG TAG-5' | 58° (-7°)                           | 57° (-8°)          |                     | 62° (-1°)                       |
| <b>b</b> | 5' -CTC <b>G</b> GC GCC ATC-3' <i>NarI</i> -G <sub>2</sub><br>3' -GAG CCG CGG TAG-5' | 60° (-5°)                           | 56° (-9°)          |                     | 64° (+1°)                       |
| <b>c</b> | 5' -CTC GGC <b>G</b> CC ATC-3' <i>NarI</i> -G <sub>3</sub><br>3' -GAG CCG CGG TAG-5' | 61° (-4°)                           | 52° (-13°)         |                     | 63° (0°)                        |
| <b>d</b> | 5' -ACC <b>G</b> GC GCC ACA-3' <i>NarI</i> -G <sub>1</sub><br>3' -TGG CCG CGG TGT-5' |                                     |                    | 51° (-10°)          |                                 |
| <b>e</b> | 5' -ACC <b>G</b> GC GCC ACA-3' <i>NarI</i> -G <sub>2</sub><br>3' -TGG CCG CGG TGT-5' |                                     |                    | 48° (-13°)          |                                 |
| <b>f</b> | 5' -ACC GGC <b>G</b> CC ACA-3' <i>NarI</i> -G <sub>3</sub><br>3' -TGG CCG CGG TGT-5' |                                     |                    | 48° (-13°)          |                                 |
| <b>g</b> | 5' -ACC GGC <b>G</b> CC ACA-3' <i>NarI</i> -G <sub>3</sub><br>3' -TGG CC- -GG TGT-5' |                                     |                    | 49° (+15°)          |                                 |
| <b>h</b> | 5' -CTC GGC <b>G</b> CC ATC-3' <i>NarI</i> -G <sub>3</sub><br>3' -GAG CC- -GG TAG-5' | 48° (+10°)                          | 44° (+6°)          |                     | 54° (+16°)                      |
| <b>i</b> | 5' -CTC GGC <b>G</b> CC ATC-3' <i>NarI</i> -G <sub>3</sub><br>3' -GAG CCG -GG TAG-5' | 55° (+4°)                           |                    |                     |                                 |

<sup>a</sup> **G** is the modified dG.

<sup>b</sup>  $\Delta T_m = T_m$  (modified) -  $T_m$  (unmodified). The  $T_m$ 's for our (entries **a-c**, 12-mer), and Fuchs' unmodified *NarI* (entries **d-f**, 12mer) oligonucleotides were 60, 65 and 61 °C, respectively. The  $T_m$ 's for our (entry **h**) and Fuch's unmodified *NarI* (entry **g**) oligonucleotide opposite a two-base deletion was 38 and 34 °C, respectively. The  $T_m$ 's for our unmodified *NarI* (entry **i**) oligonucleotide opposite a one-base deletion was 51 °C.

<sup>c</sup> Reference 1; <sup>d</sup> Reference 2; <sup>e</sup> References 3-5; <sup>f</sup> References 6,7 and this work.

- (1) Elmquist, C. E., Stover, J. S., Wang, Z. and Rizzo, C. J. (2004) Site-specific synthesis and properties of oligonucleotides containing C8-deoxyguanosine adducts of the dietary mutagen IQ. *J. Am. Chem. Soc.* *126*, 11189-11201.
- (2) Elmquist, C. E., Wang, F., Stover, J. S., Stone, M. P. and Rizzo, C. J. (2007) Conformational differences of the C8-deoxyguanosine adduct of the dietary mutagen 2-amino-3-methylimidazo[4,5-f]quinoline (IQ) within the *NarI* recognition sequence *Chem. Res. Toxicol.* *30*, 445-454.
- (3) Koehl, P., Valladier, P., Lefevre, J.-F. and Fuchs, R. P. P. (1989) Strong structural effect of the position of a single acetylaminofluorene adduct within a mutation hot spot. *Nucleic Acids Res.* *17*, 9531-9541.
- (4) Milhe, C., Fuchs, R. P. P. and Lefevre, J.-F. (1996) NMR data shows that the carcinogen N-2-acetylaminofluorene stabilises an intermediate of -2 frameshifts mutagenesis in a region of high mutation frequency. *Eur. J. Biochem.* *235*, 120-127.
- (5) Zhou, Y. and Romano, L. J. (1993) Solid-phase synthesis of oligonucleotides containing site-specific N-(2'-deoxyguanosin-8-yl)-2-(acetylamino)fluorene adducts using 9-fluorenylmethoxycarbonyl as the base-protecting group. *Biochemistry* *32*, 14043-14052.
- (6) Stavros, K.M., Hawkins, E.K., Rizzo, C.J., & Stone, M.P. (2014) Base-Displaced Intercalation of the N<sup>2</sup>-2-Amino-3-methylimidazo[4,5-f]quinoline-dG Adduct in the *NarI* Recognition Sequence. *Nucleic Acids Res.* *42*, 3450-3463.
- (7) Stover, J. S. and Rizzo, C. J. (2007) Synthesis of oligonucleotides containing the N<sup>2</sup>-deoxyguanosine adduct of the dietary carcinogen 2-amino-3-methylimidazo[4,5-f]quinoline (IQ). *Chem. Res. Toxicol.* *20*, 1972-1979.

**Table S2.** Chemical Shift Assignments (ppm) for the Non-exchangeable DNA Protons of the *N*<sup>2</sup>-dG-IQ Modified Duplex at the G<sup>1</sup> Position of the NarI Sequence. The temperature was 15 °C.

|                 | H1'  | H2'   | H2'' | H3'  | H6/H8 | H2/H5 |
|-----------------|------|-------|------|------|-------|-------|
| C <sup>1</sup>  | 5.90 | 2.32  | 2.63 | 4.70 | 7.93  | 6.01  |
| T <sup>2</sup>  | 6.18 | 2.28  | 2.61 | 4.94 | 7.71  | 1.76  |
| C <sup>3</sup>  | 6.10 | 1.76  | 2.39 | 4.94 | 7.39  | 5.63  |
| G <sup>4</sup>  | 6.26 | 2.91  | 2.77 | 5.12 | 8.30  |       |
| G <sup>5</sup>  | 5.81 | 2.562 | 2.72 | 5.03 | 7.98  |       |
| C <sup>6</sup>  | 5.62 | 2.01  | 2.38 | 4.98 | 7.22  | 5.17  |
| G <sup>7</sup>  | 5.87 | 2.64  | 2.72 | 5.00 | 7.86  |       |
| C <sup>8</sup>  | 5.93 | 2.08  | 2.46 | 4.82 | 7.35  | 5.32  |
| C <sup>9</sup>  | 5.44 | 2.17  | 2.43 | 4.94 | 7.52  | 5.62  |
| A <sup>10</sup> | 6.32 | 2.74  | 2.97 | 5.05 | 8.38  | 7.78  |
| T <sup>11</sup> | 6.04 | 2.07  | 2.48 | 5.04 | 7.25  | 1.53  |
| C <sup>12</sup> | 6.30 | 2.28  | 2.29 | 4.60 | 7.65  | 5.80  |
| G <sup>13</sup> | 5.69 | 2.61  | 2.78 |      | 7.95  |       |
| A <sup>14</sup> | 6.34 | 2.78  | 2.99 | 5.08 | 8.37  | 8.00  |
| T <sup>15</sup> | 5.73 | 1.97  | 2.36 | 5.08 | 7.14  | 1.39  |
| G <sup>16</sup> | 5.64 | 2.65  | 2.73 | 5.00 | 7.81  |       |
| G <sup>17</sup> | 5.85 | 2.68  | 2.68 | 2.54 | 7.72  |       |
| C <sup>18</sup> | 5.65 | 1.95  | 2.37 | 4.83 | 7.22  | 5.20  |
| G <sup>19</sup> | 5.89 | 2.63  | 2.74 | 5.02 | 7.86  |       |
| C <sup>20</sup> | 6.02 | 2.17  | 2.50 | 5.00 | 7.10  | 5.36  |
| C <sup>21</sup> | 6.61 | 2.43  | 2.71 | 5.11 | 8.17  | 6.31  |
| G <sup>22</sup> | 5.22 | 2.05  | 2.44 | 4.93 | 7.52  |       |
| A <sup>23</sup> | 6.02 | 2.65  | 2.89 | 5.01 | 8.05  | 7.82  |
| G <sup>24</sup> | 6.01 | 2.27  | 2.40 | 4.63 | 7.63  |       |

**Table S3.** Chemical Shift Assignments (ppm) for the Exchangeable DNA Protons of the *N*<sup>2</sup>-dG-IQ Modified Duplex at the G<sup>1</sup> Position of the NarI Sequence. The temperature was 5 °C.

|                                  | N1H/N3H | <i>N</i> <sup>4</sup> H <sub>a</sub> | <i>N</i> <sup>4</sup> H <sub>b</sub> |
|----------------------------------|---------|--------------------------------------|--------------------------------------|
| C <sup>1</sup> :G <sup>24</sup>  | 13.4    | 7.24                                 | 7.76                                 |
| T <sup>2</sup> :A <sup>23</sup>  | 14.1    |                                      |                                      |
| C <sup>3</sup> :G <sup>22</sup>  | 12.4    | 7.23                                 | 8.65                                 |
| X <sup>4</sup> :C <sup>21</sup>  | 11.8    |                                      |                                      |
| G <sup>5</sup> :C <sup>20</sup>  | 11.5    | 6.55                                 | 7.93                                 |
| C <sup>6</sup> :G <sup>19</sup>  | 12.7    | 6.32                                 | 8.18                                 |
| G <sup>7</sup> :C <sup>18</sup>  | 11.6    | 6.31                                 | 7.71                                 |
| C <sup>8</sup> :G <sup>17</sup>  | 12.9    | 6.32                                 | 8.14                                 |
| C <sup>9</sup> :G <sup>16</sup>  | 12.8    | 6.83                                 | 8.50                                 |
| A <sup>10</sup> :T <sup>15</sup> | 13.6    |                                      |                                      |
| T <sup>11</sup> :A <sup>14</sup> | 13.8    |                                      |                                      |
| C <sup>12</sup> :G <sup>13</sup> | 12.6    | 7.14                                 | 8.22                                 |

**Table S4.** Chemical Shift Assignments for the IQ Protons of the *N*<sup>2</sup>-dG-IQ Modified Duplex at the G<sup>1</sup> Position of the NarI Sequence. The temperature was 15 °C.

| IQ Proton       | $\delta$ (ppm) |
|-----------------|----------------|
| H4a             | 8.57           |
| H7a             | 8.11           |
| H8a             | 6.88           |
| H9a             | 7.74           |
| CH <sub>3</sub> | 3.23           |
